# Supplementary material
Source: Springer Nature journal article supplement (https://www.springermedizin.de/resource/supplementary/12967_2009_332_MOESM7_ESM.pdf/9576238)
Supplement: MOESM7 [file 9576238]

| ID                    |                   | No. of Clono types | Vaccination               | Source           | CDR3           |     |     |     |     |     |     |     |     |     |     |     |    | TRBV | TRBJ           | References |
|-----------------------|-------------------|--------------------|---------------------------|------------------|----------------|-----|-----|-----|-----|-----|-----|-----|-----|-----|-----|-----|----|------|----------------|------------|
| Clone                 | Patient           |                    |                           |                  | 105            | 106 | 107 | 108 | 109 | 110 | 112 | 113 | 114 | 115 | 116 | 117 |    |      |                |            |
| 16                    | 22                | 1                  | no                        | PBL <sup>a</sup> | A              | S   | T   | L   | T   | G   | L   | G   | Q   | P   | Q   | H   | 28 | 1-5  | in preparation |            |
| 27                    | M180              | 2                  | no                        | TIL <sup>b</sup> | A              | S   | T   | L   | T   | G   | L   | G   | Q   | P   | Q   | H   | 28 | 1-5  | 6              |            |
| D/a                   | N.A. <sup>c</sup> | 1                  | no                        | TIL              | A              | S   | S   | L   | Q   | G   | L   | G   | Q   | P   | Q   | H   | 28 | 1-5  | 14             |            |
| B/22                  | N.A.              | 1                  | no                        | TIL              | A              | S   | S   | Q   | Q   | G   | L   | G   | Q   | P   | Q   | H   | 28 | 1-5  | 14             |            |
| 42                    | 38                | 1                  | m Melan-A <sup>d</sup>    | PBL              | A              | S   | S   | V   | Q   | G   | L   | G   | Q   | P   | Q   | H   | 28 | 1-5  | in preparation |            |
| 4                     | 8                 | 2                  | no/m Melan-A <sup>e</sup> | PBL              | A              | S   | R   | Y   | Q   | G   | L   | G   | Q   | P   | Q   | H   | 28 | 1-5  | in preparation |            |
| B/9                   | N.A.              | 1                  | no                        | TIL              | A              | S   | S   | F   | Q   | G   | L   | G   | Q   | P   | Q   | H   | 28 | 1-5  | 14             |            |
| 17                    | 22                | 2                  | m Melan-A                 | PBL              | A              | S   | I   | W   | A   | G   | L   | G   | Q   | P   | Q   | H   | 28 | 1-5  | in preparation |            |
| 814S1                 | LAU181            | 9                  | no                        | TIL              | X <sup>f</sup> | X   | T   | N   | Q   | G   | L   | G   | Q   | P   | Q   | X   | 30 | 1-5  | 12             |            |
| 82899S26              | LAU181            | 4                  | no                        | TIL              | X              | X   | S   | P   | R   | G   | L   | G   | Q   | P   | Q   | X   | 30 | 1-5  | 12             |            |
| 814S2                 | LAU181            | 1                  | no                        | TIL              | X              | X   | S   | P   | V   | G   | L   | G   | Q   | P   | Q   | X   | 30 | 1-5  | 12             |            |
| 39                    | 38                | 2                  | no                        | PBL              | A              | W   | S   | V   | P   | G   | L   | G   | Q   | P   | Q   | H   | 30 | 1-5  | in preparation |            |
| 82899S32              | LAU181            | 2                  | no                        | TIL              | X              | X   | G   | Q   | M   | G   | L   | G   | Q   | P   | Q   | X   | 30 | 1-5  | 12             |            |
| 18                    | M180              | 2                  | no                        | TIL              | A              | S   | S   | Y   | G   | G   | L   | G   | Q   | P   | Q   | H   | 27 | 1-5  | 6              |            |
| 6                     | 8                 | 1                  | m Melan-A                 | PBL              | S              | A   | P   | D   | T   | G   | L   | G   | Q   | P   | Q   | H   | 20 | 1-5  | in preparation |            |
| A/5                   | N.A.              | 1                  | no                        | TIL              | S              | A   | S   | V   | P   | G   | L   | G   | Q   | P   | Q   | H   | 20 | 1-5  | 14             |            |
| D/b                   | N.A.              | 1                  | no                        | TIL              | A              | S   | S   | M   | T   | G   | L   | G   | Q   | P   | Q   | H   | 19 | 1-5  | 14             |            |
| 50B,55                | N.A.              | 1                  | no                        | PBL              | A              | S   | S   | F   | T   | G   | L   | G   | Q   | P   | Q   | H   | 7  | 1-5  | 14             |            |
| EM28 <sup>+</sup> +30 | LAU444            | 1                  | m Melan-A                 | PBL              | A              | S   | S   | Q   | A   | G   | L   | G   | Q   | P   | Q   | H   | 6  | 1-5  | 17             |            |
| 1E2                   | N.A.              | 1                  | no                        | TIL              | A              | S   | S   | F   | E   | G   | L   | G   | T   | E   | A   | F   | 28 | 1-1  | 10             |            |
| CTL01                 | Mela01            | 1                  | no                        | PBL              | A              | S   | S   | F   | G   | G   | L   | G   | T   | E   | A   | F   | 28 | 1-1  | 7              |            |
| 6E4                   | LAU337            | 28                 | n Melan-A <sup>g</sup>    | PBL              | A              | S   | S   | F   | L   | G   | L   | G   | T   | E   | A   | F   | 28 | 1-1  | 18             |            |
| 57                    | M199              | 1                  | no                        | TIL              | A              | S   | S   | F   | Q   | G   | L   | G   | T   | E   | A   | F   | 28 | 1-1  | 6              |            |
| 40                    | 38                | 1                  | no                        | PBL              | A              | S   | S   | L   | Q   | G   | L   | G   | T   | E   | A   | F   | 28 | 1-1  | in preparation |            |
| 41                    | 38                | 1                  | m Melan-A                 | PBL              | A              | S   | S   | Q   | Q   | G   | L   | G   | T   | E   | A   | F   | 28 | 1-1  | in preparation |            |
| 1                     | M138              | 6                  | no                        | TIL              | A              | S   | S   | P   | Q   | G   | L   | G   | T   | E   | A   | F   | 28 | 1-1  | 6              |            |
| 30                    | 30                | 1                  | no                        | PBL              | A              | W   | S   | V   | Q   | G   | L   | G   | Y   | G   | Y   | T   | 30 | 1-2  | in preparation |            |
| nd                    | LAU203            | 8                  | m Melan-A                 | TIL              | X              | X   | S   | H   | Q   | G   | L   | G   | Y   | G   | Y   | X   | 30 | 1-2  | 12             |            |
| 25                    | 15                | 3                  | m Melan-A                 | PBL              | A              | S   | R   | Q   | Q   | G   | L   | G   | S   | P   | L   | H   | 28 | 1-6  | in preparation |            |
